# Supplementary material
Source: PubMed Central journal article supplement (PMC1861013)
Supplement: heart_92_1_124__1.pdf [file heart_92_1_124__1.pdf]

## Management of infectious endocarditis (ht63719)

G Habib

### Web only refs

1. Di Salvo G, Habib G, Pergola V, *et al* Echocardiography predicts embolic events in infective endocarditis. *J Am Coll Cardiol* 2001;**37**:1069–76.
2. Cabell CH, Pond KK, Peterson GE, *et al*. the risk of stroke and death in patients with aortic and mitral valve endocarditis. *Am Heart J* 2001;**142**:75–80.
3. Netzer ROM, Zollinger E, Seiler C, *et al*. Infective endocarditis: clinical spectrum, presentation and outcome. An analysis of 212 cases 1980–1995. *Heart* 2000;**84**:25–30.
4. Tornos MP, Permanyer-Miralda G, Olana M, *et al*. Long-term complications of native valve infective endocarditis in non-addicts: a 15-year follow-up study. *Ann Int Med* 1992;**117**:567–72.
5. Chu VH, Cabell CH, Benjamin DK, *et al*. Early predictors of in-hospital death in infective endocarditis. *Circulation* 2004;**109**:1745–1749.
6. Cabell CH, Jollis JG, Peterson GE, *et al*. Changing patient characteristics and the effect on mortality in endocarditis. *Arch Intern Med* 2002;**162**(1):90–4.
7. Steckelberg JM, Murphy JG, Ballard D, *et al*. Emboli in infective endocarditis: the prognostic value of echocardiography. *Ann Intern Med* 1991;**114**(8):635–40.
8. Mugge A, Daniel WG, Frank G, *et al*. Echocardiography in infective endocarditis: reassessment of prognostic implications of vegetation size determined by the transthoracic and the transesophageal approach. *J Am Coll Cardiol* 1989;**14**(3):631–8.
9. De Castro S, Magni G, Beni S, *et al*. Role of transthoracic and transesophageal echocardiography in predicting embolic events with active infective endocarditis involving native cardiac valves. *Am J Cardiol* 1997;**80**:1030–4.
10. Vilacosta I, Graupner C, San Roman JA, *et al*. Risk of embolization after institution of antibiotic therapy for infective endocarditis. *J Am Coll Cardiol* 2002;**39**:1489–95.
11. Chirouze C, Cabell CH, Fowler VG, *et al*. Prognostic factors in 61 cases of Staphylococcus aureus prosthetic valve infective endocarditis from the international collaboration on endocarditis merged database. *Clin Inf Dis* 2004;**38**:1323–7.
12. Rohmann S, Erbel R, Gorge G, *et al*. Clinical relevance of vegetation localization by transoesophageal echocardiography in infective endocarditis. *Eur Heart J* 1992;**13**:446–52.
13. Mugge A, Daniel WG. Echocardiographic assessment of vegetations in patients with infective endocarditis. *Echocardiography* 1995;**12**:651–61.
14. Hoen B, Chirouze C, Cabell CH, *et al*. Emergence of endocarditis due to group D streptococci: findings derived from the merged database of the International Collaboration on Endocarditis. *Eur J Clin Microbiol Infect Dis* 2005;**24**:12–16.
15. Miller B, Moore J, Mallon P, *et al*. Molecular diagnosis of infective endocarditis – a new Duke’s criterion. *Scand J Infect Dis* 2001;**33**:673–80.
16. Tischler MD, Vaitkus PT. The ability of vegetation size on echocardiography to predict clinical complications: a meta-analysis. *J Am Soc Echocardiogr* 1997;**10**:562–8.
17. ACC/AHA guidelines for the management of patients with valvular disease. *J Am Coll Cardiol* 1998;**32**:1486–588.
18. Pergola V, Di Salvo G, Habib G, *et al*. Comparison of clinical and echocardiographic characteristics of *S.bovis* endocarditis with those of other pathogens. *Am J Cardiol* 2001;**88**:871–875.
19. Hoen B, Alla F, Selton-Suty C, *et al*. Changing profile of infective endocarditis. Results of a 1-year survey in France. *JAMA* 2002;**288**:75–81.
